# Supplementary material
Source: Springer Nature journal article supplement (https://www.springermedizin.de/resource/supplementary/12962_2006_40_MOESM3_ESM.pdf/9572008)

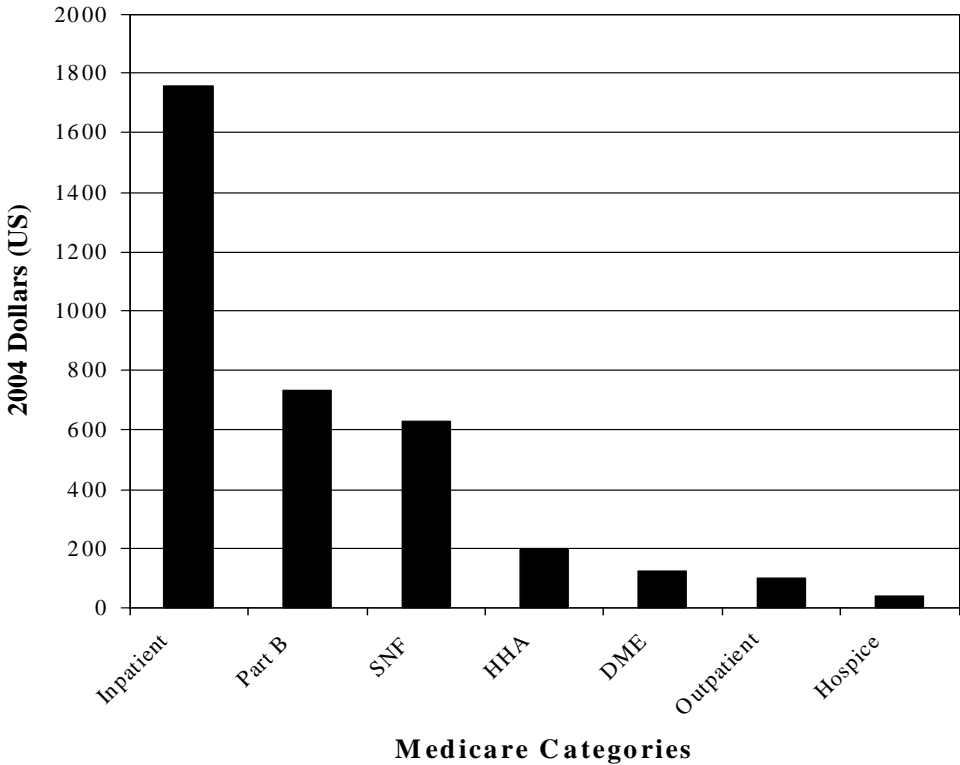

Supplement: MOESM3 [file 9572008]
